# Supplementary material for: Antioxidative attributes of rice bran extracts in ameliorative effects of atherosclerosis-associated risk factors
Source: PubMed Central journal article supplement — Heliyon. 2020 Dec 21;6(12):e05743. doi: 10.1016/j.heliyon.2020.e05743 (PMC7758525; doi:10.1016/j.heliyon.2020.e05743), 2020-12-21

# Supplementary A-1

## Experiment 1

Similar set of protein samples were loaded to 4 separate gels for each protein target:  
Corresponding non-adjusted images of gel blots are available on page 7 and page 8.

### Gel Blot 1 – iNOS (Represented in Figure 8a)

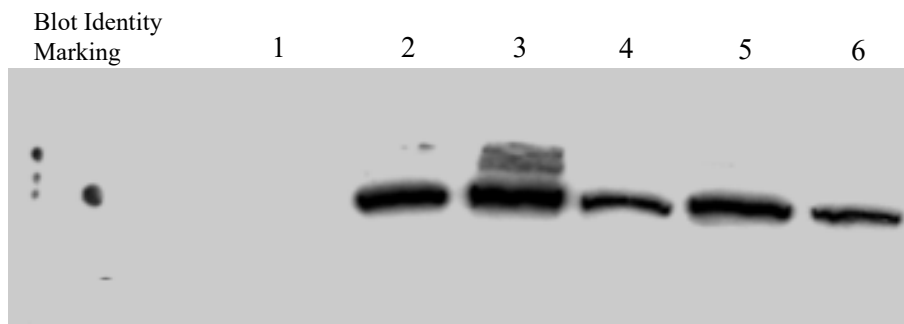

### Gel Blot 2 - TNF- $\alpha$

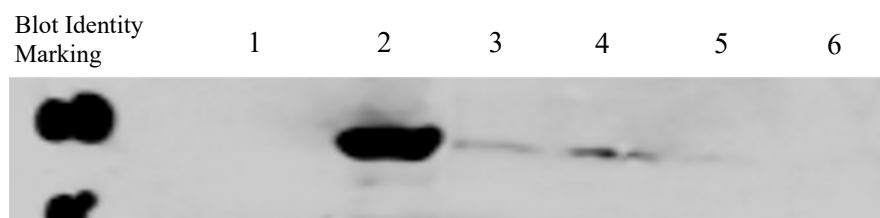

### Gel Blot 3 - IL-1 $\alpha$

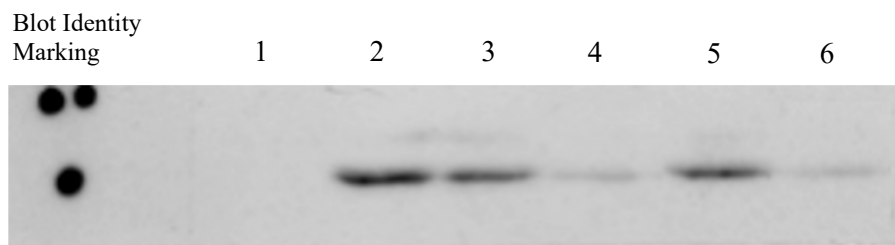

### Gel Blot 4 - $\beta$ -Actin (Represented in Figure 8a)

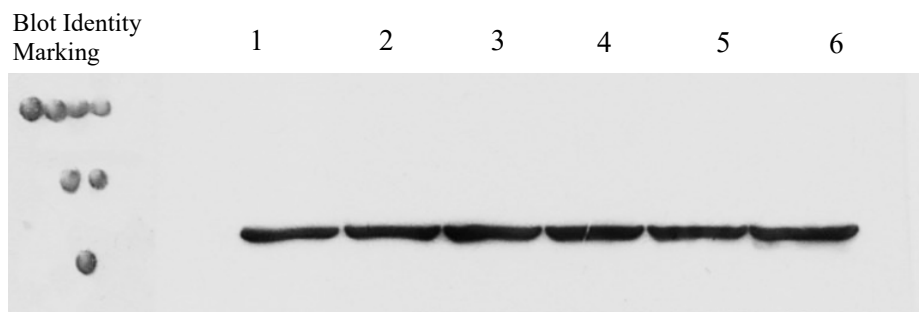

### Figure Legend

- 1 – 0  $\mu\text{g/mL}$
- 2 – 0  $\mu\text{g/mL}$  + 1  $\mu\text{g/mL}$  LPS
- 3 – 62.5  $\mu\text{g/mL}$  R.RBE + 1  $\mu\text{g/mL}$  LPS
- 4 – 125  $\mu\text{g/mL}$  R.RBE + 1  $\mu\text{g/mL}$  LPS
- 5 – 62.5  $\mu\text{g/mL}$  P.RBE + 1  $\mu\text{g/mL}$  LPS
- 6 – 125  $\mu\text{g/mL}$  P.RBE + 1  $\mu\text{g/mL}$  LPS

# Supplementary A-2

## Experiment 2

Similar set of protein samples were loaded to 4 separate gels for each protein target:  
Corresponding non-adjusted images of gel blots are available on page 7 and page 8.

### Gel Blot 1 – iNOS

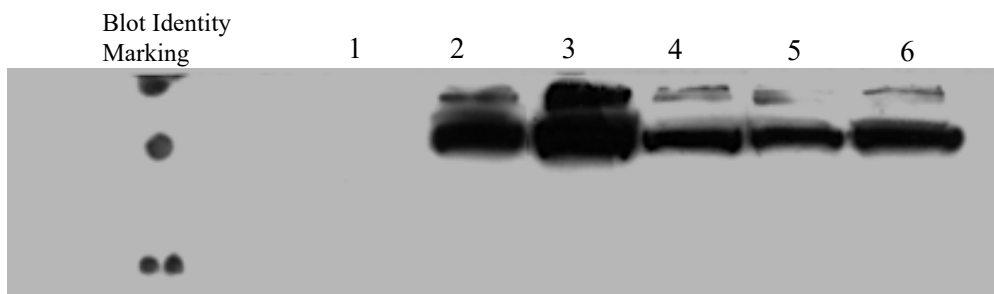

### Gel Blot 2 - TNF- $\alpha$ (Represented in Figure 8b)

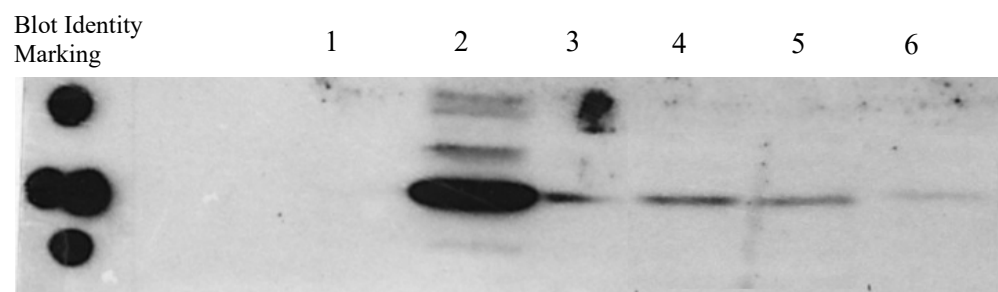

### Gel Blot 3 - IL-6

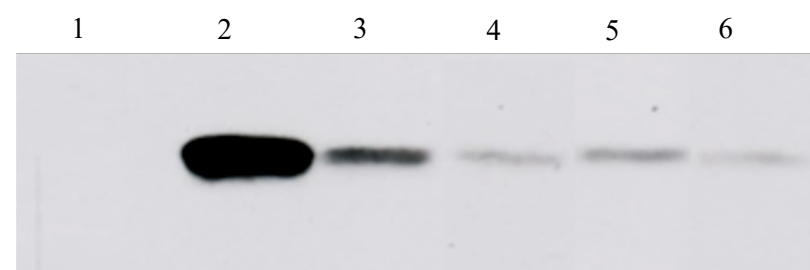

### Gel Blot 4 - $\beta$ -Actin (Represented in Figure 8b)

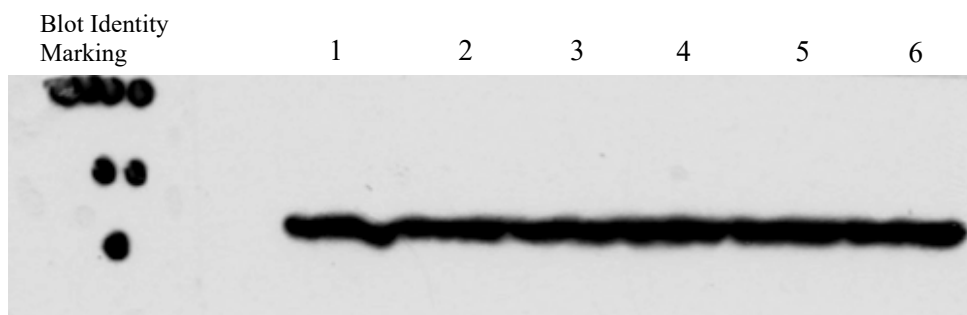

### Figure Legend

- 1 – 0  $\mu\text{g/mL}$
- 2 – 0  $\mu\text{g/mL}$  + 1  $\mu\text{g/mL}$  LPS
- 3 – 62.5  $\mu\text{g/mL}$  R.RBE + 1  $\mu\text{g/mL}$  LPS
- 4 – 125  $\mu\text{g/mL}$  R.RBE + 1  $\mu\text{g/mL}$  LPS
- 5 – 62.5  $\mu\text{g/mL}$  P.RBE + 1  $\mu\text{g/mL}$  LPS
- 6 – 125  $\mu\text{g/mL}$  P.RBE + 1  $\mu\text{g/mL}$  LPS

# Supplementary A-3

## Experiment 3

Similar set of protein samples were loaded to 3 separate gels for each protein target:  
Corresponding non-adjusted images of gel blots are available on page 7 and page 8.

### Gel Blot 1 – iNOS

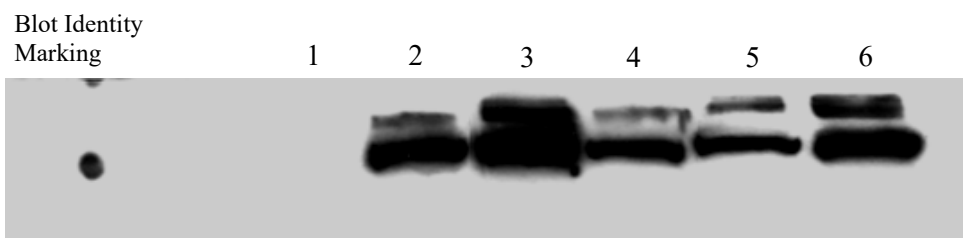

### Gel Blot 2 - IL-1 $\alpha$ (Represented in Figure 8c)

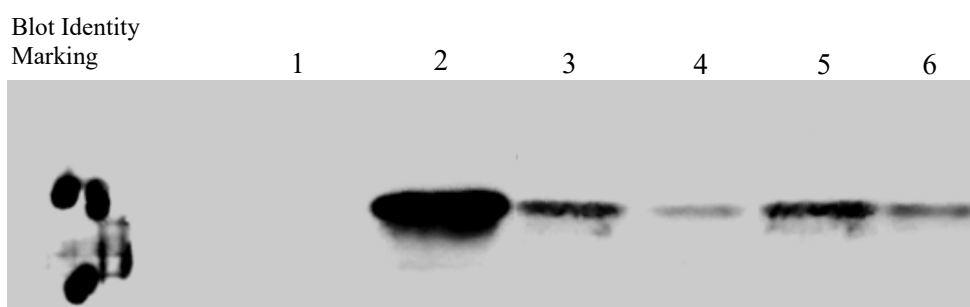

### Gel Blot 3 - $\beta$ -Actin (Represented in Figure 8c)

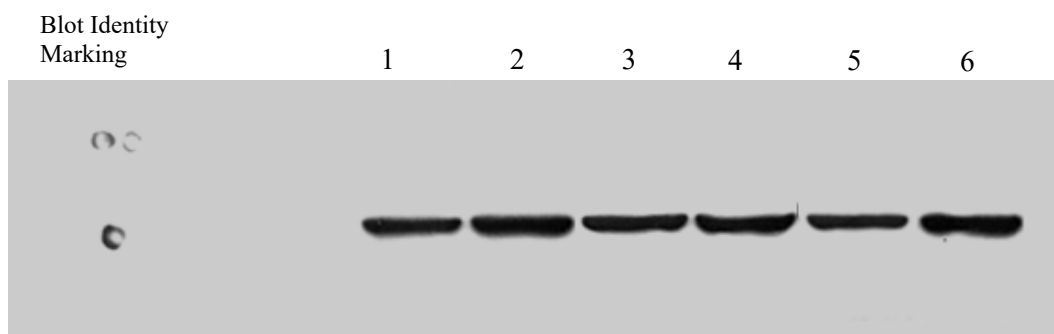

### Figure Legend

- 1 – 0  $\mu\text{g}/\text{mL}$
- 2 – 0  $\mu\text{g}/\text{mL}$  + 1  $\mu\text{g}/\text{mL}$  LPS
- 3 – 62.5  $\mu\text{g}/\text{mL}$  R.RBE + 1  $\mu\text{g}/\text{mL}$  LPS
- 4 – 125  $\mu\text{g}/\text{mL}$  R.RBE + 1  $\mu\text{g}/\text{mL}$  LPS
- 5 – 62.5  $\mu\text{g}/\text{mL}$  P.RBE + 1  $\mu\text{g}/\text{mL}$  LPS
- 6 – 125  $\mu\text{g}/\text{mL}$  P.RBE + 1  $\mu\text{g}/\text{mL}$  LPS

# Supplementary A-4

## Experiment 4

Similar set of protein samples were loaded to 3 separate gels for each protein target:  
Corresponding non-adjusted images of gel blots are available on page 7 and page 8.

### Gel Blot 1 – IL-6 (Represented in Figure 8d)

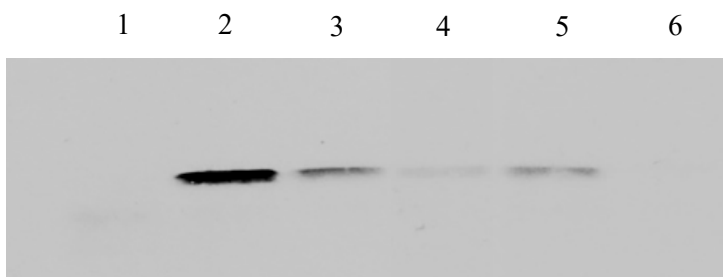

### Gel Blot 2 - IL-1 $\alpha$

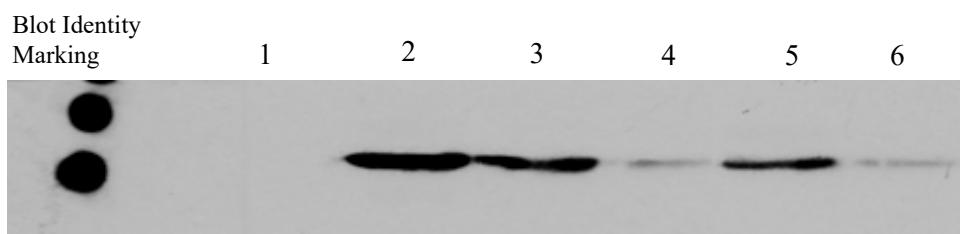

### Gel Blot 3 - $\beta$ -Actin (Represented in Figure 8d)

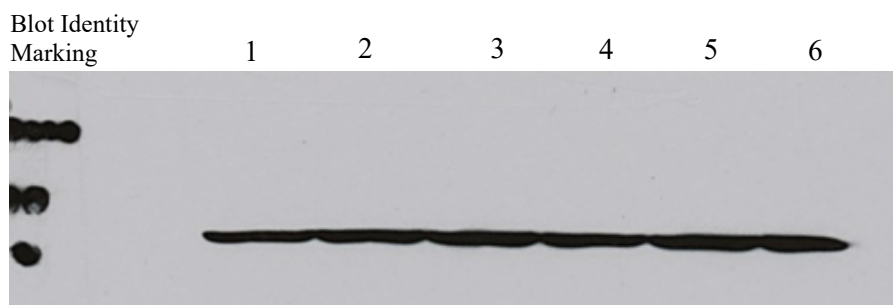

### Figure Legend

- 1 – 0  $\mu\text{g}/\text{mL}$
- 2 – 0  $\mu\text{g}/\text{mL}$  + 1  $\mu\text{g}/\text{mL}$  LPS
- 3 – 62.5  $\mu\text{g}/\text{mL}$  R.RBE + 1  $\mu\text{g}/\text{mL}$  LPS
- 4 – 125  $\mu\text{g}/\text{mL}$  R.RBE + 1  $\mu\text{g}/\text{mL}$  LPS
- 5 – 62.5  $\mu\text{g}/\text{mL}$  P.RBE + 1  $\mu\text{g}/\text{mL}$  LPS
- 6 – 125  $\mu\text{g}/\text{mL}$  P.RBE + 1  $\mu\text{g}/\text{mL}$  LPS

# Supplementary A-5

## Experiment 5

Similar set of protein samples were loaded to 2 separate gels for each protein target:  
Corresponding non-adjusted images of gel blots are available on page 7 and page 8.

### Gel Blot 1 – IL-6

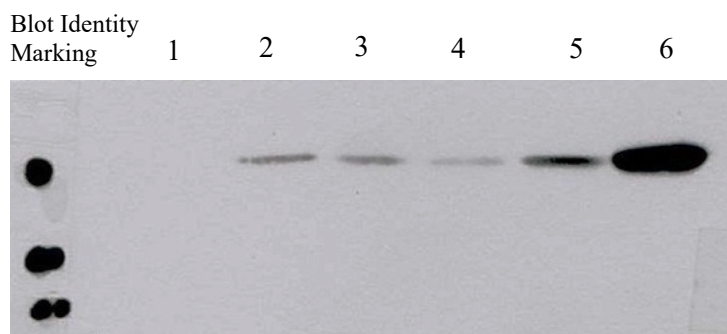

### Gel Blot 2 - $\beta$ -Actin

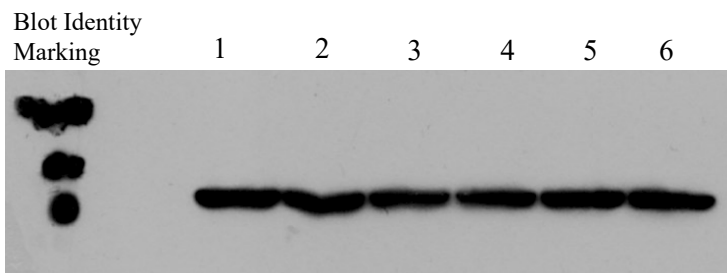

### Figure Legend

- 1 – 0  $\mu\text{g}/\text{mL}$
- 2 – 125  $\mu\text{g}/\text{mL}$  P.RBE + 1  $\mu\text{g}/\text{mL}$  LPS
- 3 – 62.5  $\mu\text{g}/\text{mL}$  P.RBE + 1  $\mu\text{g}/\text{mL}$  LPS
- 4 – 125  $\mu\text{g}/\text{mL}$  R.RBE + 1  $\mu\text{g}/\text{mL}$  LPS
- 5 – 62.5  $\mu\text{g}/\text{mL}$  R.RBE + 1  $\mu\text{g}/\text{mL}$  LPS
- 6 – 0  $\mu\text{g}/\text{mL}$  + 1  $\mu\text{g}/\text{mL}$  LPS

# Supplementary A-6

## Experiment 6

Similar set of protein samples were loaded to 2 separate gels for each protein target:  
Corresponding non-adjusted images of gel blots are available on page 7 and page 8.

### Gel Blot 1 – TNF- $\alpha$

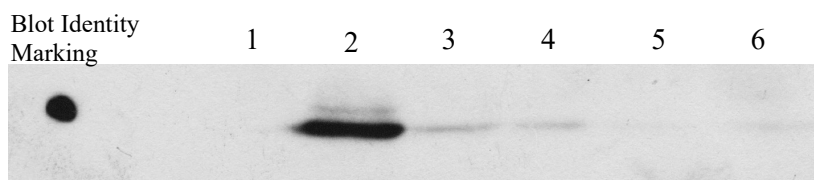

### Gel Blot 2 - $\beta$ -Actin

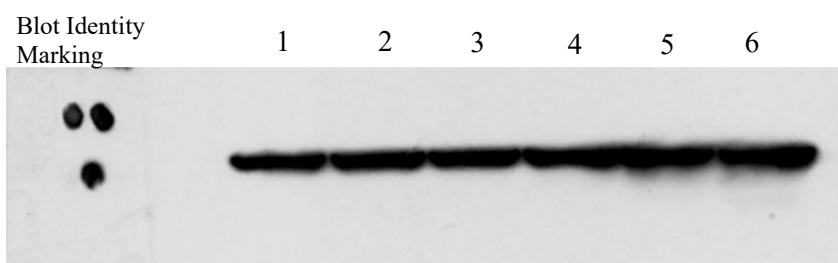

### Figure Legend

- 1 – 0  $\mu\text{g}/\text{mL}$
- 2 – 0  $\mu\text{g}/\text{mL}$  + 1  $\mu\text{g}/\text{mL}$  LPS
- 3 – 62.5  $\mu\text{g}/\text{mL}$  R.RBE + 1  $\mu\text{g}/\text{mL}$  LPS
- 4 – 125  $\mu\text{g}/\text{mL}$  R.RBE + 1  $\mu\text{g}/\text{mL}$  LPS
- 5 – 62.5  $\mu\text{g}/\text{mL}$  P.RBE + 1  $\mu\text{g}/\text{mL}$  LPS
- 6 – 125  $\mu\text{g}/\text{mL}$  P.RBE + 1  $\mu\text{g}/\text{mL}$  LPS

# Gel Blots

Non-adjusted images of gel blots

**iNOS**

Supplementary A-1  
Experiment 1 Gel Blot 1

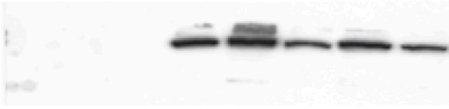

**iNOS**

Supplementary A-2  
Experiment 2 Gel Blot 1

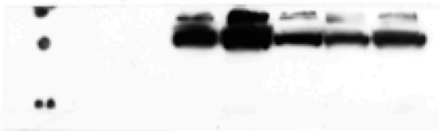

**iNOS**

Supplementary A-3  
Experiment 3 Gel Blot 1

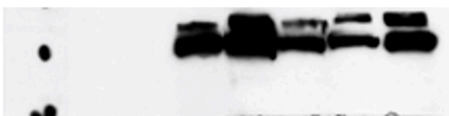

**IL-1 $\alpha$**

Supplementary A-1  
Experiment 1 Gel Blot 3

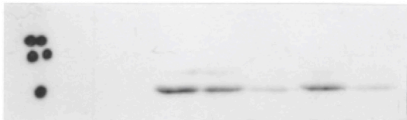

**IL-1 $\alpha$**

Supplementary A-3  
Experiment 3 Gel Blot 2

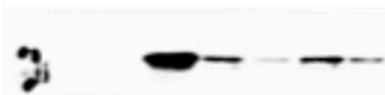

**IL-1 $\alpha$**

Supplementary A-4  
Experiment 4 Gel Blot 2

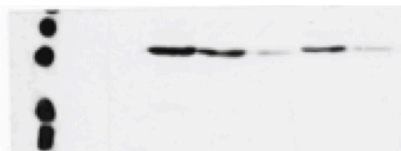

**TNF- $\alpha$**

Supplementary A-1  
Experiment 1 Gel Blot 2

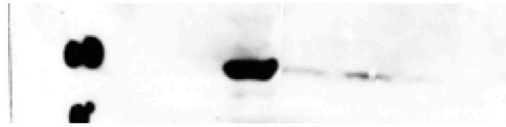

**TNF- $\alpha$**

Supplementary A-2  
Experiment 2 Gel Blot 2

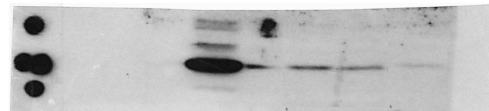

**TNF- $\alpha$**

Supplementary A-6  
Experiment 6 Gel Blot 1

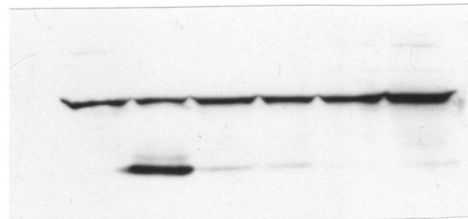

**IL-6**

Supplementary A-2  
Experiment 2 Gel Blot 3

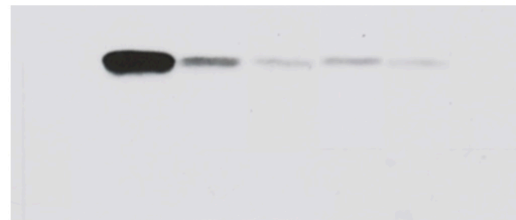

**IL-6**

Supplementary A-4  
Experiment 4 Gel Blot 1

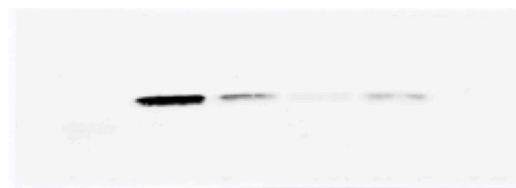

**IL-6**

Supplementary A-5  
Experiment 5 Gel Blot 1

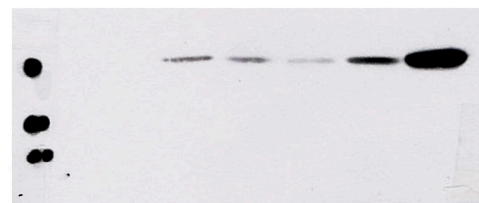

# Gel Blots

Non-adjusted images of gel blots

**$\beta$ -Actin** Supplementary A-1  
Experiment 1 Gel Blot 4

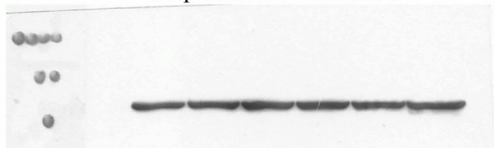

**$\beta$ -Actin** Supplementary A-2  
Experiment 2 Gel Blot 4

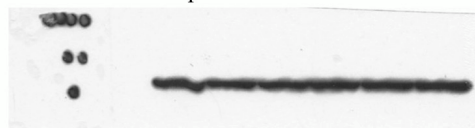

**$\beta$ -Actin** Supplementary A-3  
Experiment 3 Gel Blot 3

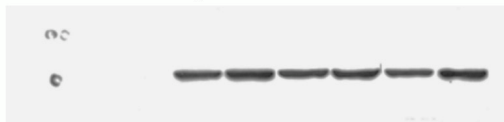

**$\beta$ -Actin** Supplementary A-4  
Experiment 4 Gel Blot 3

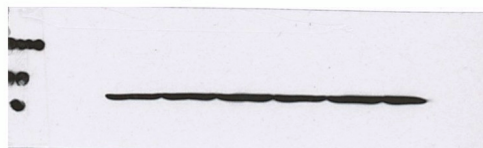

**$\beta$ -Actin** Supplementary A-5  
Experiment 5 Gel Blot 2

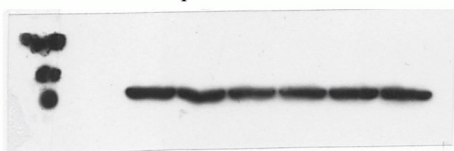

**$\beta$ -Actin** Supplementary A-5  
Experiment 5 Gel Blot 3

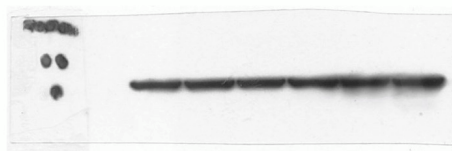

Supplement: mmc1.pdf [file mmc1.pdf]
